# Supplementary material for: Nanozyme-based Robots Swarm with Exciton-Engineered Z-Scheme Heterojunctions for Depth-Resolved Tumour Penetration and Therapy
Source: Research Square preprint supplement (doi:10.21203/rs.3.rs-6432792/v1), 2025-08-04
Supplement: Supplementary file 1 [file a03cf20f09cdf2928c58ca00.docx]

**Supplementary Information**

**Nanozyme-based Robots Swarm with Exciton-Engineered Z-Scheme Heterojunctions for Depth-Resolved Tumour Penetration and Therapy**

Zhengya Yue1,Minglu Tang1, Shuo Wang1, Xiangwei Liu1, Tiedong Sun1,*, Li Shang2,*, and Zhiguang Wu3,*

Affiliations

1 College of Chemistry, Chemical Engineering and Resource Utilization Northeast Forestry University Harbin 150040, P. R. China.

Z. Y., M. T., S. W., X. L., J. L., & Prof. T. S (E-mail: tiedongsun@nefu.edu.cn)

2 State Key Laboratory of Solidification Processing, School of Materials Science and Engineering, Northwestern Polytechnical University, Xi'an 710072, P. R. China.

Prof. L. S., (E-mail: [li.shang@nwpu.edu.cn](mailto:li.shang@nwpu.edu.cn))

3 School of Medicine and Healthcare, State Key Laboratory of Robotics and System, Harbin Institute of Technology, Harbin 150080, P. R. China.

Prof. Z. W. (E-mail: zhiguangwu@hit.edu.cn)

Supplementary Figures


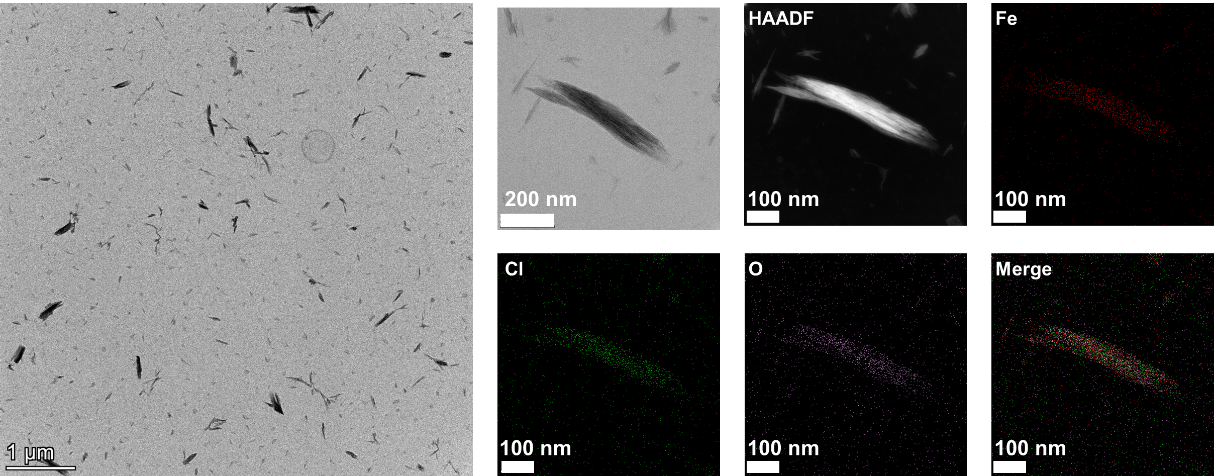


**Supplementary Figure 1.** Transmission electron microscopy (TEM), and Energy dispersive X-ray spectroscopy (EDS) mapping images of NRs. (HAADF, Fe, Cl, O and Merege)

**Supplementary Figure 2.** EDS spectroscopy of the NRs (Fe, O, Cl, P, and Mo elements).

**Supplementary Figure 3.** Histogram of content of different elements in NRs and EDNRs (Fe, O, Cl, P, and Mo elements).

| Elements | NRs | EDNRs |
| --- | --- | --- |
| O | 68.9% | 65.5% |
| P | 0% | 0.6% |
| Cl | 10.4% | 9.1% |
| Fe | 20.7% | 19.0% |
| Mo | 0% | 5.8% |

**Supplementary Figure 4.** The different elements content in NRs and EDNRs (Fe, O, Cl, P, and Mo elements).


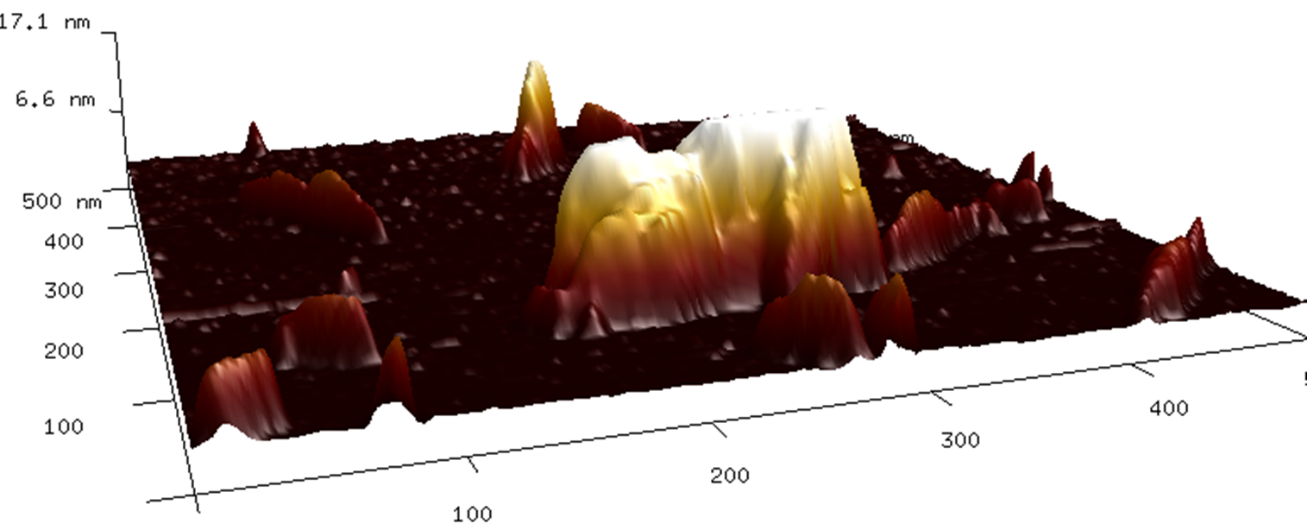


**Supplementary Figure 5.** 3D Atomic force microscopy (AFM) image of EDNRs.

**Supplementary Figure 6.** The high-resolution XPS spectra of Fe 2p in NRs and corresponding fitting analysis.

**Supplementary Figure 7.** The high-resolution XPS spectra of Cl 2p in NRs and EDNRs

**Supplementary Figure 8.** Nyquist plots of the electrochemical impedance spectrum (EIS) of NRs NSs and EDNRs.

**Supplementary Figure 9.** UV–vis spectra of TMB at various concentrations of EDNRs.

**Supplementary Figure 10.** UV–vis spectra of DPBF at various concentrations of EDNRs.


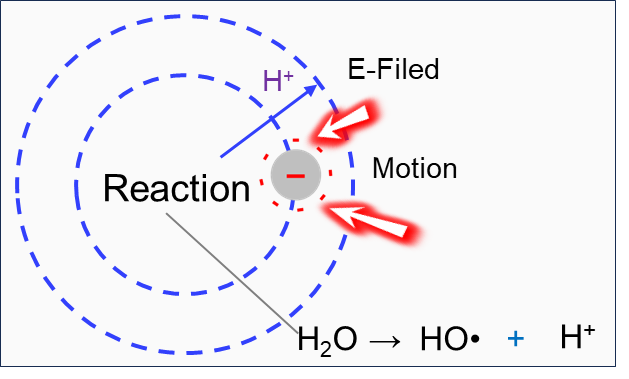


**Supplementary Figure 11.** The mechanism illustration of light-induced Chemotaxis motion of EDNRs.

**Supplementary Figure 12.** The corresponding norlarmized intensity of 5(6)-FAM.

**Supplementary Figure 13.** Relative cell viability of normal L929 cells after incubation with EDNRs for 24 h and 48 h.

**Supplementary Figure 14.** The quantitativecalculations of the corresponding live/dead fluorescence images.

**Supplementary Figure 15.** The corresponding intensity of DCF.


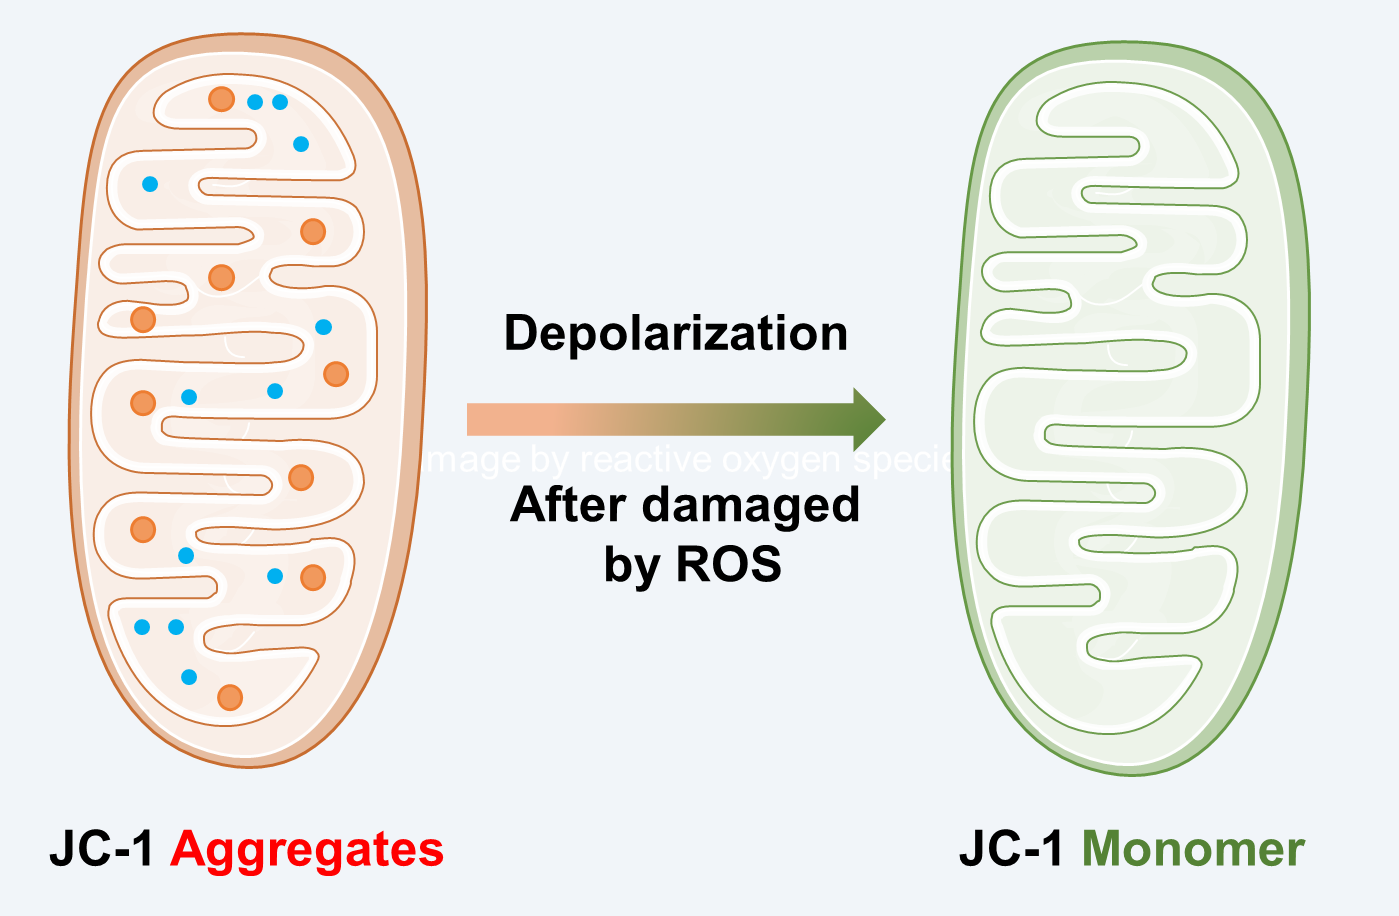


**Supplementary Figure 16.** Diagram il of the JC-1 assays for the detection of mitochondrial membrane potential (MMP).


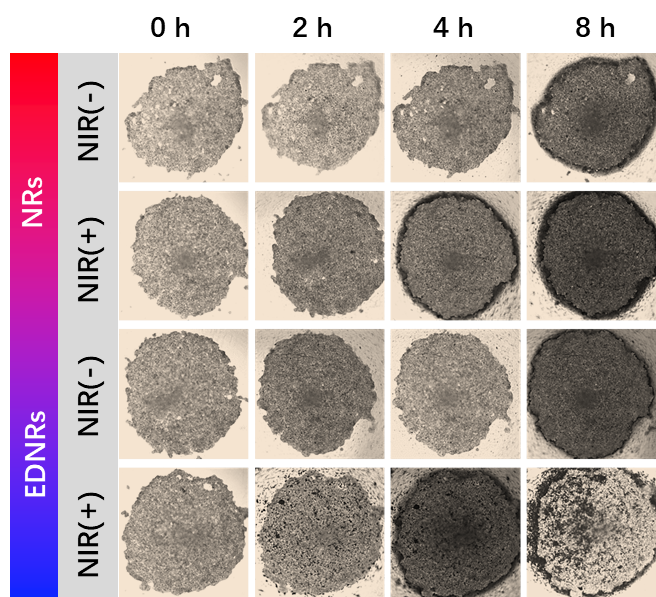


**Supplementary Figure 17.** Digital images of 3D MTSs after different treatments Motor and Non-Motor with or without NIR irration.


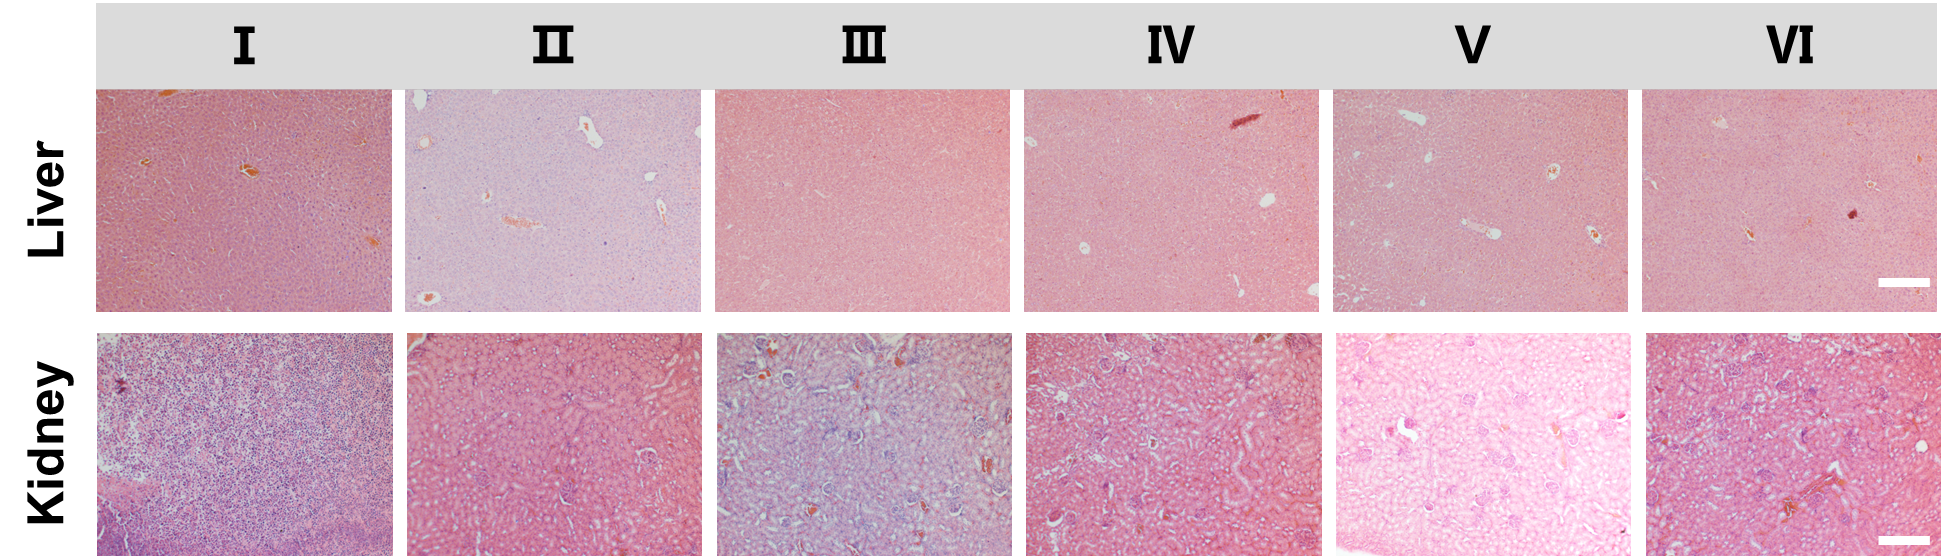


**Supplementary Figure 18.** H&E staining images of liver and kidney in the various treatments: (Ⅰ) Ctrl, (Ⅱ) NIR, (Ⅲ) NRs, (Ⅳ) NRs+NIR, (Ⅴ) EDNRs and (Ⅵ) EDNRs+NIR. (scale bar: 200 µm).

Information for the supporting videos:

Supplementary Movie.1 The motion trajectories of NRs, NRs+NIR, EDNRs and EDNRs+NIR (NIR 650 nm).

Supplementary Movie.2 The collective swarm motion of the EDNRs.

Supplementary Movie.3 The chemotaxis movement of EDNRs swarms.
